# Supplementary material for: A ten-genes-based diagnostic signature for atherosclerosis
Source: PubMed Central journal article supplement (PMC8540101; doi:10.1186/s12872-021-02323-9), 2021-10-23

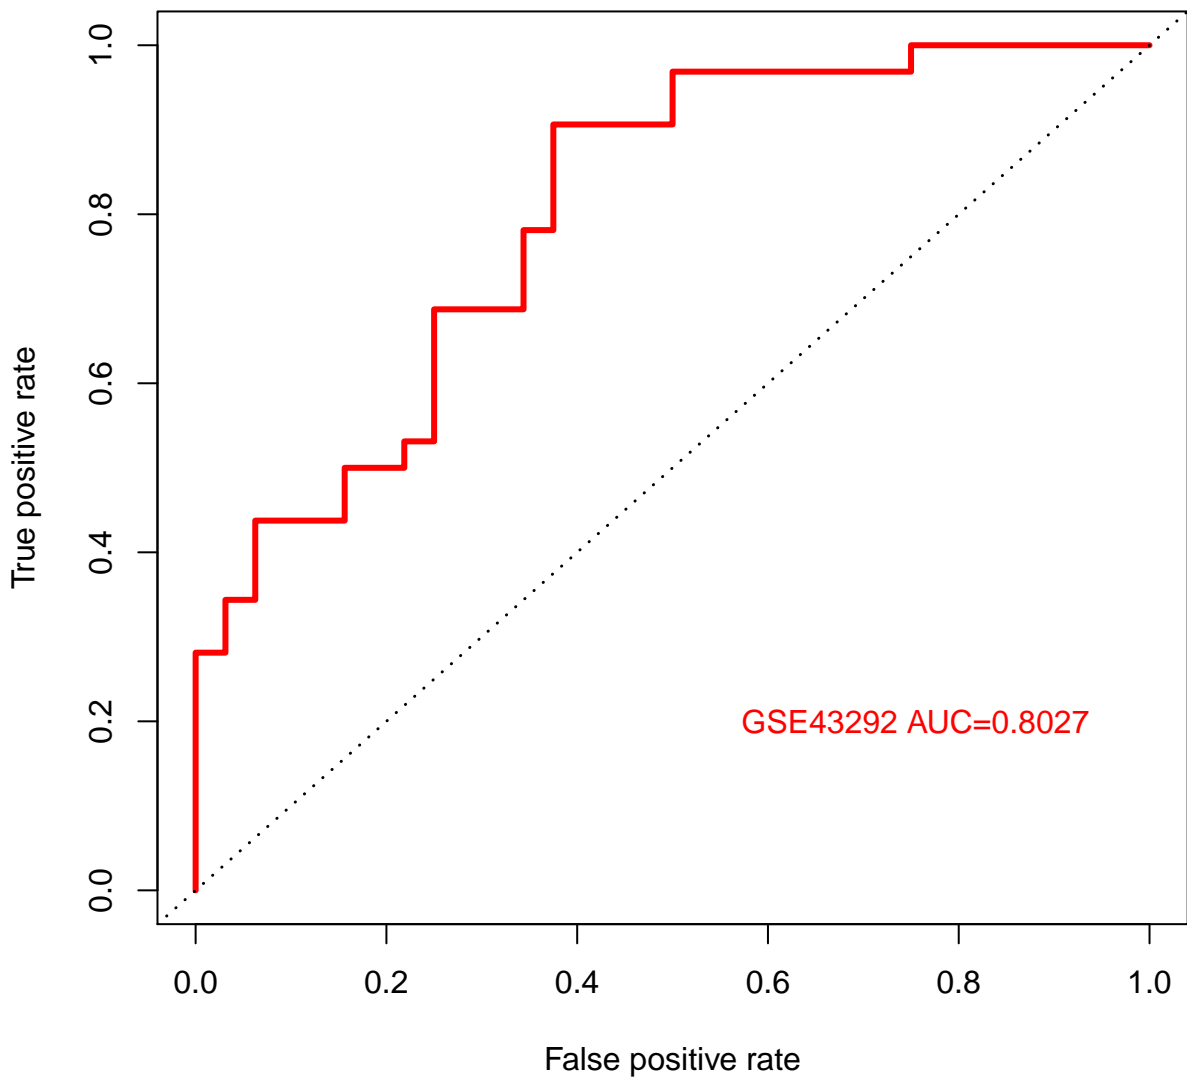

Supplement: 12872_2021_2323_MOESM1_ESM.pdf [file 12872_2021_2323_MOESM1_ESM.pdf]
